# Supplementary material for: Association of Mortality and Years of Potential Life Lost With Active Tuberculosis in the United States
Source: PubMed Central journal article supplement (PMC7512053; doi:10.1001/jamanetworkopen.2020.14481), 2020-09-23
Supplement: jamanetwopen-e2014481-s001.pdf [file jamanetwopen-e2014481-s001.pdf]

## Supplementary Online Content

Lee-Rodriguez C, Wada PY, Hung YY, Skarbinski J. Association of mortality and years of potential life lost with active tuberculosis in the United States. *JAMA Netw Open*. 2020;3(9):e2014481.  
doi:10.1001/jamanetworkopen.2020.14481

**eTable.** Cox Regression-Adjusted Mortality per 1000 Person-Years Stratified by Select Characteristics Among Patients With Active Tuberculosis (TB) Disease Compared With an Age, Sex, Date-of-Diagnosis Matched Cohort of Patients Without Active TB Disease, Kaiser Permanente Northern California, 1997-2017

This supplementary material has been provided by the authors to give readers additional information about their work.

**eTable: Cox regression-adjusted mortality per 1000 person-years stratified by select characteristics among patients with active tuberculosis (TB) disease compared with an age, sex, date-of-diagnosis matched cohort of patients without active TB disease, Kaiser Permanente Northern California, 1997-2017**

|                 |                                                     | <b>Active TB<br/>Rate (95% CI)</b> | <b>Comparison cohort<br/>Rate (95% CI)</b> | <b>Adjusted rate ratio<br/>(95% CI)</b> |
|-----------------|-----------------------------------------------------|------------------------------------|--------------------------------------------|-----------------------------------------|
| Total           |                                                     | 24.31 (21.98-26.64)                | 13.44 (13.17-13.70)                        | 1.81 (1.63-1.99)                        |
| Sex             | Male                                                | 29.36 (25.86-32.85)                | 15.63 (15.25-16.02)                        | 1.88 (1.62-2.11)                        |
|                 | Female                                              | 18.45 (15.47-21.44)                | 10.80 (10.45-11.16)                        | 1.71 (1.43-1.99)                        |
| Age in years    | 0-24                                                | 1.97 (0.00-4.22)                   | 1.11 (0.84-1.39)                           | 1.77 (0-4.04)                           |
|                 | 25-44                                               | 4.98 (3.20-6.77)                   | 2.29 (2.10-2.48)                           | 2.18 (1.39-3.00)                        |
|                 | 45-64                                               | 24.23 (20.42-28.04)                | 8.78 (8.43-9.14)                           | 2.76 (2.32-3.21)                        |
|                 | 65+                                                 | 70.56 (61.42-79.69)                | 40.62 (39.66-41.58)                        | 1.74 (1.51-1.97)                        |
| Race/ Ethnicity | White, Not Hispanic                                 | 45.61 (56.29-34.92)                | 16.76 (17.16-16.35)                        | 2.72 (2.08-3.36)                        |
|                 | Black, Not Hispanic                                 | 27.52 (36.85-18.19)                | 13.51 (14.48-12.54)                        | 2.04 (1.34-2.75)                        |
|                 | Hispanic                                            | 24.02 (30.26-17.78)                | 8.80 (9.35-8.25)                           | 2.73 (2.01-3.47)                        |
|                 | Asian/Pacific Islander                              | 21.16 (23.97-18.36)                | 8.08 (8.61-7.54)                           | 2.62 (2.42-3.02)                        |
|                 | American Indian/<br>Alaska Native/ Other/mixed race | 22.35 (29.45-15.24)                | 10.04 (10.82-9.25)                         | 2.23 (1.51-3.00)                        |
| Comorbidities   | Diabetes                                            | 40.54 (34.35-46.73)                | 32.48 (31.05-33.92)                        | 1.25 (1.21-1.29)                        |
|                 | End stage renal disease                             | 106.53 (65.62-147.43)              | 76.42 (60.34-92.49)                        | 1.39 (1.38-1.41)                        |
|                 | HIV infection                                       | 28.81 (12.06-45.57)                | 18.80 (12.37-25.22)                        | 1.53 (1.52-1.55)                        |
|                 | Post-organ transplant                               | 61.39 (12.73-110.05)               | 43.72 (25.57-61.88)                        | 1.40 (1.38-1.43)                        |
|                 | History of malignant cancer diagnosis               | 78.92 (60.00-97.84)                | 42.58 (40.17-44.98)                        | 1.85 (1.84-1.86)                        |

Cox regression model adjusted for sex, age group, race/ethnicity, and selected comorbidities

P value <0.001 for all rate ratios except age group 0-24 years.
